# Supplementary material for: SB202190 Predicts BRAF-Activating Mutations in Primary Colorectal Cancer Organoids via Erk1-2 Modulation
Source: MDPI journal article supplement (doi:10.3390/cells12040664), 2023-02-20
Supplement: s1 [file s1]

**Table S3.** T-Test statistics form data represented in fig.4 and 5 (organoids growth).

**Red dot**  $p > 0.05$ ; **Yellow dot**  $0.01 \leq p \leq 0.05$  \*; **Green dot**  $p < 0.01$  \*\* or \*\*\*

| SB vs CTR  | BRAF-mutated organoids |            |              |            |              |            |              |            |              |            | EGFR pathway wild-type organoids |            |              |            |              |            |
|------------|------------------------|------------|--------------|------------|--------------|------------|--------------|------------|--------------|------------|----------------------------------|------------|--------------|------------|--------------|------------|
|            | OMCR13-011TK           |            | OMCR16-005TK |            | OMCR18-025TK |            | OMCR18-059TK |            | OMCR19-011TK |            | OMCR18-035TK                     |            | OMCR18-060TK |            | OMCR19-010TK |            |
|            | p=                     |            | p=           |            | p=           |            | p=           |            | p=           |            | p=                               |            | p=           |            | p=           |            |
| 0.5        |                        | 5.3235E-04 |              | 8.7531E-01 |              | 3.9418E-04 |              | 2.6135E-01 |              | 1.1984E-01 |                                  | 6.2099E-02 |              | 2.6623E-02 |              | 9.3817E-05 |
| 1.0        |                        | 2.2139E-04 |              | 1.8948E-01 |              | 8.6383E-05 |              | 1.9484E-01 |              | 5.6388E-01 |                                  | 7.7289E-02 |              | 6.1185E-02 |              | 1.2739E-07 |
| 1.5        |                        | 1.2976E-03 |              | 2.5056E-03 |              | 8.5685E-03 |              | 5.5511E-01 |              | 3.7155E-01 |                                  | 3.7862E-01 |              | 1.7017E-04 |              | 1.4343E-06 |
| 2.0        |                        | 2.5929E-01 |              | 5.5822E-04 |              | 6.9611E-01 |              | 8.5728E-02 |              | 7.2542E-01 |                                  | 4.5068E-03 |              | 4.0765E-03 |              | 2.7156E-06 |
| 2.5        |                        | 4.8304E-01 |              | 4.8077E-05 |              | 8.4610E-02 |              | 4.8636E-03 |              | 7.0078E-01 |                                  | 3.7790E-02 |              | 4.8724E-05 |              | 1.6083E-06 |
| 3.0        |                        | 2.4971E-01 |              | 1.8543E-06 |              | 3.2373E-05 |              | 5.2493E-04 |              | 9.3575E-01 |                                  | 4.6054E-05 |              | 6.3509E-05 |              | 7.7925E-06 |
| 3.5        |                        | 1.4359E-01 |              | 5.1917E-06 |              | 2.4538E-07 |              | 9.2890E-06 |              | 9.0887E-01 |                                  | 1.7894E-06 |              | 4.8786E-05 |              | 7.1549E-07 |
| 4.0        |                        | 7.6335E-02 |              | 5.4902E-06 |              | 1.0182E-07 |              | 2.0807E-07 |              | 9.2935E-01 |                                  | 4.7321E-12 |              | 4.3581E-03 |              | 1.3423E-03 |
| 4.5        |                        | 2.2895E-02 |              | 1.5149E-06 |              | 2.2923E-08 |              | 1.0746E-09 |              | 5.0255E-01 |                                  | 3.4536E-12 |              | 2.4376E-04 |              | 2.3413E-04 |
| 5.0        |                        | 3.6319E-03 |              | 2.2644E-07 |              | 1.5892E-08 |              | 8.2336E-09 |              | 2.8149E-02 |                                  | 2.4312E-10 |              | 1.9580E-04 |              | 4.3953E-04 |
| 5.5        |                        | 1.2362E-03 |              | 5.8902E-08 |              | 1.0034E-09 |              | 2.5111E-10 |              | 5.0258E-02 |                                  | 8.2891E-12 |              | 1.3416E-03 |              | 1.7352E-03 |
| 6.0        |                        | 2.1858E-04 |              | 1.3440E-07 |              | 3.1959E-09 |              | 6.2119E-09 |              | 5.0440E-02 |                                  | 1.9466E-10 |              | 3.0553E-02 |              | 4.9056E-03 |
| 6.5        |                        | 2.1187E-04 |              | 8.9563E-08 |              | 4.1119E-09 |              | 5.9869E-08 |              | 3.0499E-02 |                                  | 8.2564E-10 |              | 1.5517E-01 |              | 4.1497E-03 |
| 7.0        |                        | 8.6875E-05 |              | 1.5540E-08 |              | 1.6478E-09 |              | 1.6779E-07 |              | 8.2171E-04 |                                  | 4.5077E-09 |              | 1.6784E-01 |              | 3.9379E-02 |
| 7.5        |                        | 8.1921E-06 |              | 1.2704E-08 |              | 6.2978E-09 |              | 6.2731E-10 |              | 2.6800E-02 |                                  | 1.3968E-08 |              | 3.2865E-02 |              | 3.0071E-02 |
| 8.0        |                        | 1.0427E-05 |              | 2.7223E-08 |              | 1.0485E-08 |              | 5.3159E-09 |              | 4.4076E-02 |                                  | 1.9033E-09 |              | 3.4285E-02 |              | 1.3418E-01 |
| 8.5        |                        | 1.1686E-04 |              | 2.4831E-07 |              | 2.7801E-08 |              | 4.6819E-10 |              | 7.7665E-03 |                                  | 1.6812E-11 |              | 3.8304E-03 |              | 2.9550E-02 |
| 9.0        |                        | 1.7510E-05 |              | 2.0927E-07 |              | 5.3597E-08 |              | 1.1542E-09 |              | 4.4019E-04 |                                  | 1.3910E-10 |              | 1.5216E-04 |              | 5.0980E-02 |
| DBF vs CTR | p=                     |            | p=           |            | p=           |            | p=           |            | p=           |            | p=                               |            | p=           |            | p=           |            |
| 0.5        |                        | 2.1429E-01 |              | 2.5188E-01 |              | 7.6765E-01 |              | 2.8953E-02 |              | 2.4777E-01 |                                  | 3.2037E-01 |              | 3.8831E-01 |              | 3.5082E-01 |
| 1.0        |                        | 1.5990E-02 |              | 1.1279E-01 |              | 8.8631E-02 |              | 1.4181E-06 |              | 8.4776E-01 |                                  | 2.5996E-09 |              | 1.8685E-01 |              | 2.8077E-03 |
| 1.5        |                        | 2.0084E-04 |              | 1.2091E-02 |              | 1.2522E-02 |              | 2.1323E-09 |              | 8.4132E-01 |                                  | 5.5596E-11 |              | 2.3018E-01 |              | 2.0032E-04 |
| 2.0        |                        | 1.0151E-04 |              | 8.4271E-03 |              | 1.3300E-04 |              | 4.9182E-09 |              | 8.2288E-01 |                                  | 6.7653E-15 |              | 3.0812E-02 |              | 1.3767E-07 |
| 2.5        |                        | 1.9628E-05 |              | 9.7950E-04 |              | 8.2598E-06 |              | 2.1577E-09 |              | 2.4618E-01 |                                  | 2.8148E-14 |              | 3.0102E-02 |              | 1.2905E-08 |
| 3.0        |                        | 5.6049E-06 |              | 3.4964E-05 |              | 1.5954E-06 |              | 1.9117E-08 |              | 9.9810E-02 |                                  | 1.1022E-15 |              | 1.1119E-02 |              | 2.0060E-11 |
| 3.5        |                        | 6.5107E-05 |              | 4.5701E-05 |              | 1.2490E-07 |              | 3.3765E-09 |              | 2.4628E-02 |                                  | 7.6319E-17 |              | 2.3425E-03 |              | 5.9356E-10 |
| 4.0        |                        | 1.1547E-04 |              | 3.3750E-05 |              | 1.4560E-07 |              | 8.0809E-09 |              | 3.8316E-02 |                                  | 2.6434E-16 |              | 6.2423E-06 |              | 2.4524E-10 |

|            |     |    |            |    |            |    |            |    |            |    |            |    |            |    |            |    |            |
|------------|-----|----|------------|----|------------|----|------------|----|------------|----|------------|----|------------|----|------------|----|------------|
|            | 4.5 |    | 2.3551E-04 |    | 2.0343E-05 |    | 2.5904E-08 |    | 3.2200E-10 |    | 4.4991E-02 |    | 8.3889E-14 |    | 1.9290E-05 |    | 6.8484E-09 |
|            | 5.0 |    | 1.2429E-03 |    | 2.4893E-06 |    | 3.6605E-08 |    | 6.9522E-09 |    | 8.3000E-04 |    | 2.0012E-11 |    | 1.7584E-05 |    | 1.3966E-08 |
|            | 5.5 |    | 2.7322E-03 |    | 1.4796E-06 |    | 1.7806E-09 |    | 4.4789E-10 |    | 4.4532E-03 |    | 2.0074E-12 |    | 9.6813E-05 |    | 6.7678E-09 |
|            | 6.0 |    | 4.5353E-03 |    | 4.0256E-06 |    | 7.1821E-09 |    | 9.5269E-09 |    | 2.7795E-03 |    | 5.9885E-11 |    | 3.3752E-05 |    | 3.6385E-08 |
|            | 6.5 |    | 1.5750E-02 |    | 9.1679E-06 |    | 1.2552E-08 |    | 1.5934E-07 |    | 8.3471E-03 |    | 3.5275E-10 |    | 5.7711E-05 |    | 5.2563E-09 |
|            | 7.0 |    | 6.0915E-02 |    | 4.9227E-06 |    | 5.2600E-09 |    | 1.2292E-06 |    | 7.9186E-04 |    | 3.1053E-09 |    | 9.2023E-06 |    | 1.2869E-09 |
|            | 7.5 |    | 1.7158E-01 |    | 2.5484E-06 |    | 4.4423E-08 |    | 7.1459E-09 |    | 5.8079E-04 |    | 1.3275E-08 |    | 6.6552E-04 |    | 4.5161E-09 |
|            | 8.0 |    | 3.6041E-01 |    | 5.4844E-06 |    | 9.9027E-08 |    | 3.8799E-07 |    | 1.7437E-03 |    | 1.7892E-09 |    | 1.1575E-02 |    | 1.2258E-07 |
|            | 8.5 |    | 2.7876E-01 |    | 4.2597E-05 |    | 4.7217E-07 |    | 6.4452E-06 |    | 1.0397E-01 |    | 1.3574E-11 |    | 3.4403E-02 |    | 6.4860E-09 |
|            | 9.0 |    | 7.5664E-01 |    | 1.9144E-04 |    | 1.9303E-06 |    | 1.5966E-02 |    | 1.8910E-01 |    | 1.1213E-10 |    | 1.9274E-02 |    | 6.8200E-09 |
| PLX vs CTR |     | p= |            | p= |            | p= |            | p= |            | p= |            | p= |            | p= |            | p= |            |
|            | 0.5 |    | 4.6997E-02 |    | 8.8651E-01 |    | 8.2607E-01 |    | 2.6355E-02 |    | 3.7420E-01 |    | 8.0641E-01 |    | 2.2575E-01 |    | 8.3041E-01 |
|            | 1.0 |    | 1.7216E-05 |    | 6.3289E-01 |    | 7.2143E-01 |    | 9.9401E-06 |    | 4.7364E-01 |    | 1.4079E-05 |    | 3.8032E-01 |    | 5.4617E-01 |
|            | 1.5 |    | 5.6436E-07 |    | 2.6671E-01 |    | 1.3059E-01 |    | 4.0420E-09 |    | 5.0451E-01 |    | 4.2226E-05 |    | 6.9132E-02 |    | 8.2845E-01 |
|            | 2.0 |    | 8.4713E-07 |    | 2.6669E-01 |    | 4.9477E-03 |    | 3.8461E-09 |    | 2.3450E-01 |    | 9.3381E-11 |    | 4.3140E-01 |    | 8.9256E-01 |
|            | 2.5 |    | 1.4070E-07 |    | 2.3688E-01 |    | 1.0270E-03 |    | 2.4925E-10 |    | 3.8999E-01 |    | 1.2049E-06 |    | 4.2131E-02 |    | 9.7874E-01 |
|            | 3.0 |    | 2.3556E-08 |    | 2.2703E-02 |    | 6.3933E-05 |    | 6.8176E-09 |    | 1.9991E-01 |    | 4.6006E-07 |    | 7.2965E-02 |    | 8.6123E-01 |
|            | 3.5 |    | 2.4319E-07 |    | 7.4527E-02 |    | 5.6487E-06 |    | 8.8645E-10 |    | 1.1552E-01 |    | 4.4954E-07 |    | 8.5224E-03 |    | 2.5233E-01 |
|            | 4.0 |    | 1.7071E-07 |    | 9.5575E-02 |    | 2.4732E-06 |    | 3.4836E-09 |    | 4.3781E-02 |    | 2.2613E-08 |    | 3.3538E-02 |    | 8.6796E-01 |
|            | 4.5 |    | 3.9173E-07 |    | 1.4537E-01 |    | 5.6175E-07 |    | 1.5175E-10 |    | 3.3866E-02 |    | 4.4458E-08 |    | 1.8086E-03 |    | 5.3522E-01 |
|            | 5.0 |    | 4.1436E-06 |    | 1.8135E-01 |    | 6.0931E-07 |    | 4.6464E-09 |    | 1.0102E-01 |    | 7.5879E-06 |    | 3.5666E-04 |    | 4.6231E-01 |
|            | 5.5 |    | 6.1911E-06 |    | 4.2559E-01 |    | 2.1495E-08 |    | 2.1511E-10 |    | 5.2727E-03 |    | 5.0211E-06 |    | 3.6799E-04 |    | 5.5154E-01 |
|            | 6.0 |    | 3.8375E-06 |    | 4.1167E-01 |    | 1.0886E-07 |    | 4.4600E-09 |    | 4.3875E-03 |    | 2.5694E-04 |    | 4.2706E-04 |    | 5.7778E-01 |
|            | 6.5 |    | 8.5203E-06 |    | 4.7054E-01 |    | 7.8041E-07 |    | 1.5713E-07 |    | 2.7783E-03 |    | 2.2365E-03 |    | 2.0217E-04 |    | 1.5405E-01 |
|            | 7.0 |    | 1.5407E-05 |    | 2.8423E-01 |    | 1.7367E-06 |    | 1.9780E-06 |    | 4.5681E-02 |    | 2.7979E-02 |    | 7.5686E-03 |    | 4.5669E-01 |
|            | 7.5 |    | 1.7906E-06 |    | 3.4703E-01 |    | 5.1746E-06 |    | 1.1969E-08 |    | 4.9168E-04 |    | 1.6108E-02 |    | 1.3546E-03 |    | 2.3067E-01 |
|            | 8.0 |    | 2.7575E-06 |    | 7.0422E-01 |    | 8.8508E-06 |    | 1.9853E-06 |    | 2.0288E-03 |    | 1.2521E-03 |    | 9.6068E-04 |    | 5.1465E-01 |
|            | 8.5 |    | 6.2796E-05 |    | 7.0799E-01 |    | 1.5062E-04 |    | 2.1193E-04 |    | 3.4976E-03 |    | 5.5230E-04 |    | 1.5326E-04 |    | 2.7640E-01 |
|            | 9.0 |    | 1.0696E-05 |    | 7.2418E-01 |    | 8.6538E-04 |    | 1.1242E-04 |    | 5.7078E-02 |    | 2.8631E-03 |    | 4.1878E-04 |    | 8.4921E-01 |
