# Supplementary material for: SB202190 Predicts BRAF-Activating Mutations in Primary Colorectal Cancer Organoids via Erk1-2 Modulation
Source: MDPI journal article supplement (doi:10.3390/cells12040664), 2023-02-20
Supplement: s1 [file s1]

Figure S1: Sanger validation of BRAF mutations

**Sample: OMCR18-059TK**

**NGS**

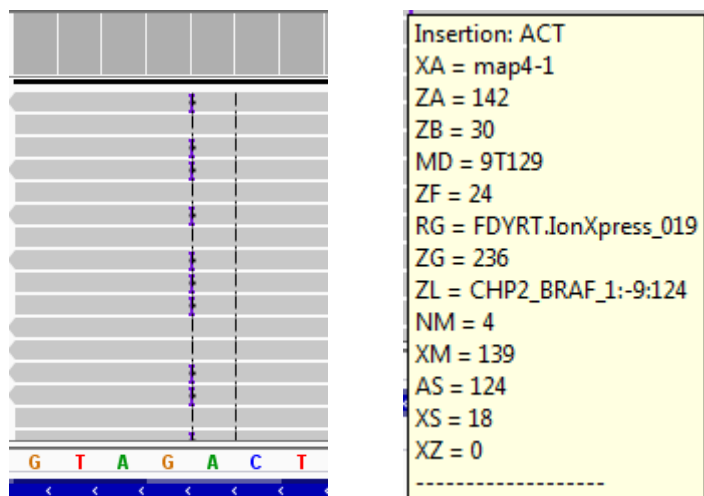

**Sanger Seq**

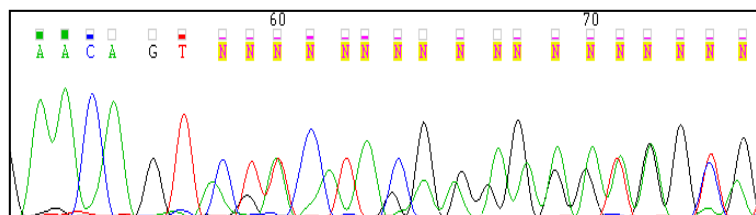

***BRAF* c. 1412\_1413insAGT; *BRAF* p.V471dup**

**Sample: OMCR13-011TK**

**NGS**

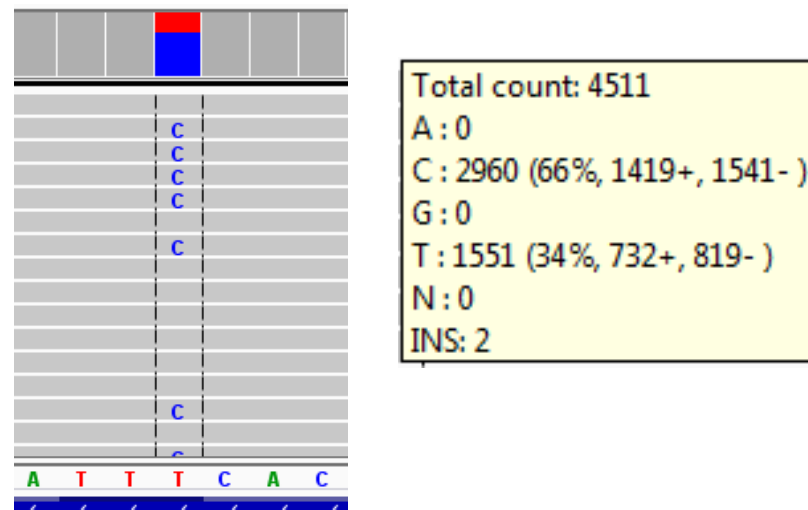

**Sanger Seq**

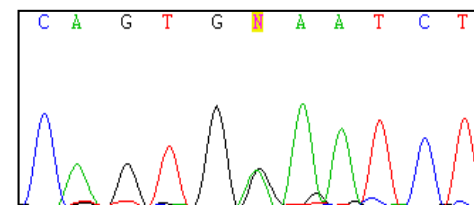

***BRAF* c.1801A>G; *BRAF* p.K601E**

# Sample: OMCR16-005TK

## NGS

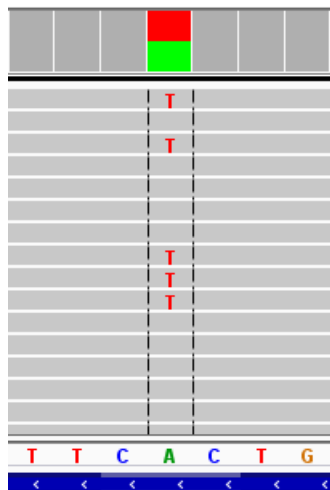

Total count: 6839  
A : 3360 (49%, 1574+, 1786- )  
C : 6 (0%, 2+, 4- )  
G : 3 (0%, 2+, 1- )  
T : 3470 (51%, 1548+, 1922- )  
N : 0  
INS: 3

## Sanger Seq

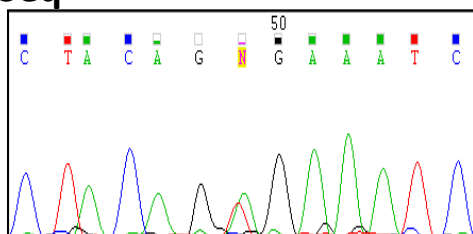

## ddPCR (51.5%)

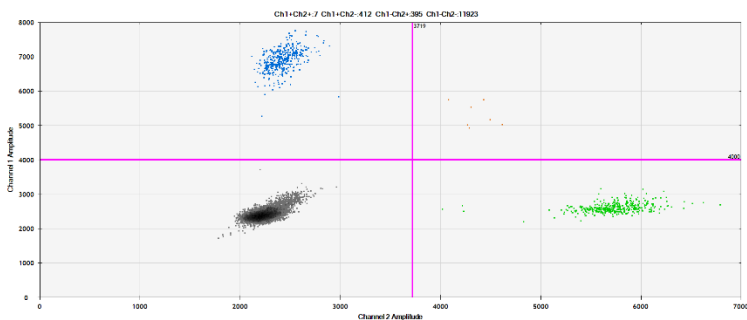

**BRAF c.1799T>A; BRAF p.V600E**

# Sample: OMCR18-025TK

## NGS

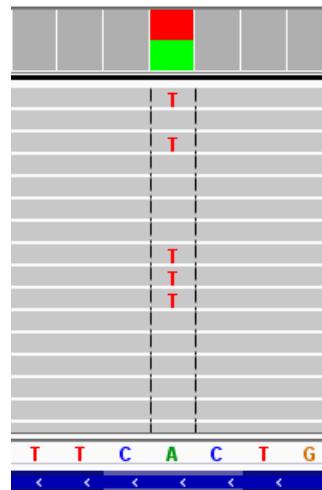

Total count: 4125  
A : 2116 (51%, 1102+, 1014- )  
C : 4 (0%, 2+, 2- )  
G : 3 (0%, 2+, 1- )  
T : 2002 (49%, 1011+, 991- )  
N : 0  
INS: 1

## Sanger Seq

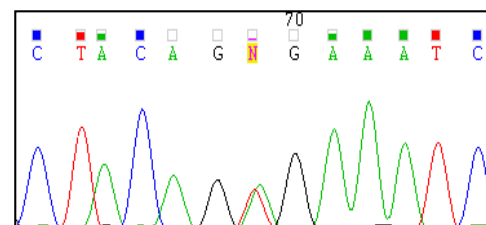

## ddPCR (50.6%)

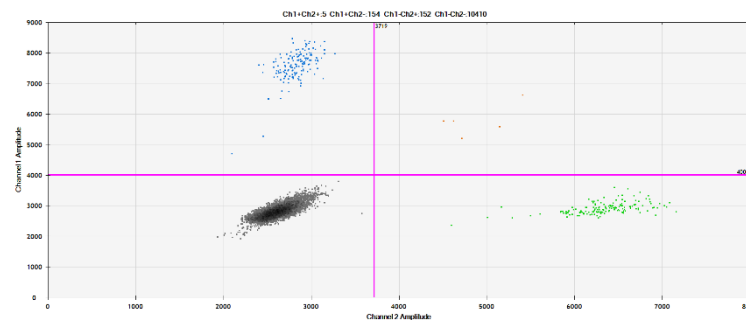

**BRAF c.1799T>A; BRAF p.V600E**

Sample: OMCR19-011TK

NGS

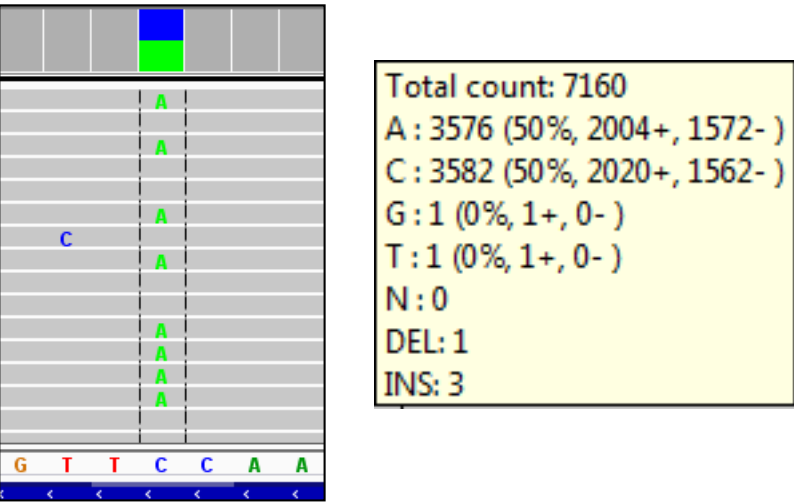

Sanger Seq

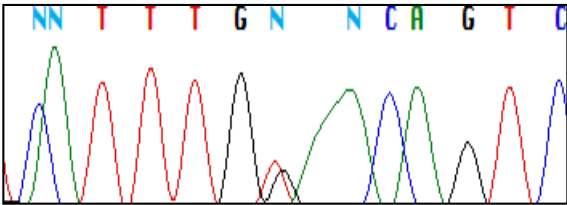

**BRAF c.1406G>T; BRAF p.G469V**

Sample: OMCR19-060TK

NGS

Wild Type

Sanger Seq

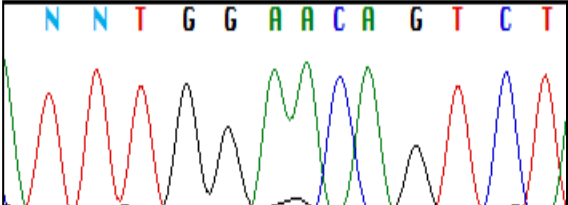

**BRAF Wild-type; BRAF Wild-type**
